# Supplementary material for: Risk assessment of trace metals in sunblock creams using DABCOnium-based ionic liquid–functionalized magnetic nanoparticles
Source: Royal Society of Chemistry journal article supplement (doi:10.1039/d3ay00675a), 2023-01-01
Supplement: d3ay00675a1.pdf [file d3ay00675a1.pdf]

## Electronic Supplementary Information

### **Risk assessment of trace metals in sunblock creams using DABCONium-based ionic liquid functionalized magnetic nanoparticles**

Sahar Hedayatafza<sup>a</sup>, Parviz Aberoomand Azar<sup>a</sup>, Hamed Sahebi<sup>b\*</sup>

<sup>a</sup>Department of Chemistry, Faculty of Basic Sciences, Science and Research Branch, Islamic Azad University, Tehran, Iran

<sup>b</sup> Halal Research Center of IRI, Food and Drug Administration, Ministry of Health and Medical Education, Tehran, Iran

\*Corresponding Author

E-mail: [h.sahebi@fda.gov.ir](mailto:h.sahebi@fda.gov.ir)

Tel: + 98 9124112022

**Table S1.** The applied values of the chosen factors of CCD.

| Factors  | Name            | Units         | Level       |     |      |     |           |
|----------|-----------------|---------------|-------------|-----|------|-----|-----------|
|          |                 |               | $-\alpha^a$ | -1  | 0    | 1   | $+\alpha$ |
| A        | Sample pH       |               | 1           | 3   | 5    | 7   | 9         |
| B        | Sorbent dosage  | mg            | 7.5         | 10  | 12.5 | 15  | 17.5      |
| C        | Extraction time | min           | 0.5         | 1.0 | 1.5  | 2.0 | 2.5       |
| D        | Desorption time | min           | 0.5         | 1.0 | 1.5  | 2.0 | 2.5       |
| E        | Eluent amount   | $\mu\text{L}$ | 50          | 300 | 550  | 800 | 1050      |
| Response | ER              | %             |             |     |      |     |           |

<sup>a</sup>  $\alpha = 2.0$ .

**Table S2.** Results of the CCD.

| Run | Factors <sup>a</sup> |    |    |    |    | Response <sup>b</sup> |        |       |       |
|-----|----------------------|----|----|----|----|-----------------------|--------|-------|-------|
|     | A                    | B  | C  | D  | E  | Cd                    | Cr     | Ni    | Pb    |
| 1   | 0                    | 0  | 2  | 0  | 0  | 95.86                 | 97.23  | 96.07 | 93.95 |
| 2   | 1                    | -1 | -1 | 1  | 1  | 48.74                 | 50.97  | 48.65 | 47.39 |
| 3   | -1                   | 1  | -1 | -1 | -1 | 66.29                 | 65.41  | 65.15 | 64.23 |
| 4   | 0                    | -2 | 0  | 0  | 0  | 77.23                 | 77.75  | 76.97 | 76.53 |
| 5   | 1                    | 1  | 1  | 1  | 1  | 51.32                 | 51.45  | 50.78 | 48.59 |
| 6   | 1                    | -1 | -1 | -1 | -1 | 71.31                 | 70.54  | 67.45 | 65.99 |
| 7   | 0                    | 0  | 0  | 0  | 2  | 65.36                 | 69.15  | 65.36 | 64.45 |
| 8   | 1                    | 1  | -1 | -1 | 1  | 63.49                 | 67.26  | 65.46 | 64.06 |
| 9   | 0                    | 0  | 0  | 0  | 0  | 99.15                 | 98.78  | 96.45 | 95.35 |
| 10  | -1                   | -1 | 1  | -1 | -1 | 74.53                 | 76.35  | 74.87 | 75.15 |
| 11  | -1                   | 1  | 1  | 1  | -1 | 77.95                 | 77.69  | 77.09 | 76.54 |
| 12  | -1                   | -1 | 1  | 1  | 1  | 68.19                 | 72.36  | 72.15 | 66.34 |
| 13  | -2                   | 0  | 0  | 0  | 0  | 86.04                 | 86.72  | 86.07 | 86.92 |
| 14  | -1                   | -1 | -1 | -1 | 1  | 64.59                 | 67.32  | 69.42 | 61.85 |
| 15  | 1                    | -1 | 1  | -1 | 1  | 73.64                 | 71.18  | 70.14 | 68.81 |
| 16  | 0                    | 0  | 0  | 0  | 0  | 98.45                 | 99.74  | 96.36 | 94.62 |
| 17  | -1                   | -1 | -1 | 1  | -1 | 71.7                  | 72.63  | 70.88 | 69.56 |
| 18  | 1                    | 1  | -1 | 1  | -1 | 47.09                 | 50.65  | 49.57 | 44.97 |
| 19  | -1                   | 1  | 1  | -1 | 1  | 80.15                 | 82.64  | 80.02 | 78.56 |
| 20  | 0                    | 0  | -2 | 0  | 0  | 75.38                 | 76.77  | 76.23 | 76.34 |
| 21  | 1                    | 1  | 1  | -1 | -1 | 59.45                 | 59.47  | 60.65 | 59.38 |
| 22  | 0                    | 0  | 0  | 2  | 0  | 58.77                 | 58.47  | 57.85 | 58.12 |
| 23  | 0                    | 0  | 0  | 0  | 0  | 96.24                 | 98.35  | 96.86 | 97.15 |
| 24  | 0                    | 0  | 0  | 0  | 0  | 96.56                 | 100.17 | 97.65 | 96.45 |
| 25  | 0                    | 0  | 0  | -2 | 0  | 65.42                 | 66.45  | 65.15 | 64.07 |
| 26  | 0                    | 0  | 0  | 0  | -2 | 70.61                 | 71.13  | 70.65 | 69.99 |
| 27  | 0                    | 2  | 0  | 0  | 0  | 70.15                 | 71.69  | 69.41 | 67.92 |
| 28  | -1                   | 1  | -1 | 1  | 1  | 71.59                 | 72.45  | 71.63 | 71.15 |
| 29  | 0                    | 0  | 0  | 0  | 0  | 98.62                 | 97.15  | 98.72 | 96.34 |
| 30  | 2                    | 0  | 0  | 0  | 0  | 63.07                 | 61.18  | 62.49 | 62.04 |
| 31  | 0                    | 0  | 0  | 0  | 0  | 96.56                 | 100.61 | 97.15 | 94.63 |
| 32  | 1                    | -1 | 1  | 1  | -1 | 76.46                 | 80.14  | 78.52 | 77.42 |

<sup>a</sup> A: Sample pH, B: Sorbent dosage (mg), C: Extraction time (min), D: Desorption time (min), E: Eluent amount ( $\mu\text{L}$ )

<sup>b</sup> Extraction recovery (%)

**Table S3.** ANOVA table for quadratic model (Response: Mean ER%).

| Source                         | Cd          |         |          | Cr          |         |          | Ni          |         |          | Pb          |         |          |
|--------------------------------|-------------|---------|----------|-------------|---------|----------|-------------|---------|----------|-------------|---------|----------|
|                                | Mean Square | F-value | p-value  |
| Model                          | 346.87      | 141.13  | < 0.0001 | 350.89      | 104.84  | < 0.0001 | 335.33      | 204.7   | < 0.0001 | 348.75      | 181.08  | < 0.0001 |
| A                              | 698.01      | 283.99  | < 0.0001 | 773.73      | 231.17  | < 0.0001 | 783.76      | 478.43  | < 0.0001 | 776.69      | 403.27  | < 0.0001 |
| B                              | 88.13       | 35.86   | < 0.0001 | 90.44       | 27.02   | 0.0003   | 91.46       | 55.83   | < 0.0001 | 74.38       | 38.62   | < 0.0001 |
| C                              | 398.94      | 162.31  | < 0.0001 | 375.8       | 112.28  | < 0.0001 | 381.52      | 232.9   | < 0.0001 | 390.51      | 202.76  | < 0.0001 |
| D                              | 120.2       | 48.9    | < 0.0001 | 95.16       | 28.43   | 0.0002   | 97.97       | 59.8    | < 0.0001 | 95.88       | 49.78   | < 0.0001 |
| E                              | 46.96       | 19.1    | 0.0011   | 18.74       | 5.6     | 0.0374   | 29.28       | 17.88   | 0.0014   | 58.81       | 30.54   | 0.0002   |
| AB                             | 270.36      | 110     | < 0.0001 | 179.09      | 53.51   | < 0.0001 | 125.83      | 76.81   | < 0.0001 | 226.43      | 117.57  | < 0.0001 |
| AC                             | 0.8055      | 0.3277  | 0.5785   | 4.42        | 1.32    | 0.2748   | 0.228       | 0.1392  | 0.7162   | 0.2475      | 0.1285  | 0.7268   |
| AD                             | 144.9       | 58.95   | < 0.0001 | 93.36       | 27.89   | 0.0003   | 92.5        | 56.46   | < 0.0001 | 119.19      | 61.89   | < 0.0001 |
| AE                             | 7.8         | 3.17    | 0.1025   | 32.01       | 9.56    | 0.0102   | 43.53       | 26.57   | 0.0003   | 8.02        | 4.17    | 0.066    |
| BC                             | 16.14       | 6.57    | 0.0264   | 33.32       | 9.96    | 0.0092   | 31.78       | 19.4    | 0.0011   | 36.81       | 19.11   | 0.0011   |
| BD                             | 0.3752      | 0.1526  | 0.7035   | 10.97       | 3.28    | 0.0976   | 6.93        | 4.23    | 0.0642   | 12.06       | 6.26    | 0.0294   |
| BE                             | 186.39      | 75.83   | < 0.0001 | 213.23      | 63.71   | < 0.0001 | 136.83      | 83.53   | < 0.0001 | 232.33      | 120.63  | < 0.0001 |
| CD                             | 10.1        | 4.11    | 0.0676   | 15.66       | 4.68    | 0.0534   | 24.03       | 14.67   | 0.0028   | 6.31        | 3.28    | 0.0976   |
| CE                             | 3.16        | 1.29    | 0.281    | 13.67       | 4.08    | 0.0683   | 25.38       | 15.49   | 0.0023   | 41.89       | 21.75   | 0.0007   |
| DE                             | 119.08      | 48.45   | < 0.0001 | 159.45      | 47.64   | < 0.0001 | 154.82      | 94.5    | < 0.0001 | 118.54      | 61.55   | < 0.0001 |
| A <sup>2</sup>                 | 969.14      | 394.3   | < 0.0001 | 1113.03     | 332.54  | < 0.0001 | 929.93      | 567.66  | < 0.0001 | 893.69      | 464.02  | < 0.0001 |
| B <sup>2</sup>                 | 1043.44     | 424.53  | < 0.0001 | 1044.55     | 312.08  | < 0.0001 | 1022.12     | 623.94  | < 0.0001 | 1085.56     | 563.65  | < 0.0001 |
| C <sup>2</sup>                 | 260.79      | 106.1   | < 0.0001 | 246.25      | 73.57   | < 0.0001 | 208.01      | 126.98  | < 0.0001 | 238.83      | 124.01  | < 0.0001 |
| D <sup>2</sup>                 | 2304.19     | 937.48  | < 0.0001 | 2393.13     | 714.99  | < 0.0001 | 2284.73     | 1394.68 | < 0.0001 | 2305.73     | 1197.19 | < 0.0001 |
| E <sup>2</sup>                 | 1602.15     | 651.85  | < 0.0001 | 1483.86     | 443.33  | < 0.0001 | 1520.3      | 928.05  | < 0.0001 | 1578.05     | 819.36  | < 0.0001 |
| Lack of Fit                    | 3.14        | 1.92    | 0.2452   | 4.75        | 2.87    | 0.134    | 2.35        | 3.02    | 0.123    | 2.62        | 2.38    | 0.1795   |
| <b>R<sup>2</sup></b>           |             |         | 0.9961   |             |         | 0.9948   |             |         | 0.9973   |             |         | 0.997    |
| <b>Adjusted R<sup>2</sup></b>  |             |         | 0.9891   |             |         | 0.9853   |             |         | 0.9924   |             |         | 0.9915   |
| <b>Predicted R<sup>2</sup></b> |             |         | 0.9257   |             |         | 0.8913   |             |         | 0.9436   |             |         | 0.9417   |
| <b>Adeq Precision</b>          |             |         | 40.0711  |             |         | 33.3771  |             |         | 47.4678  |             |         | 45.5127  |

**Table S4.** The effect of potentially interfering ions on the extraction recovery of the selected TMs  
(n = 3).

| Ions                          | Interference to metal ion ratio | R% <sup>a</sup> ± S <sup>b</sup> |        |        |        |
|-------------------------------|---------------------------------|----------------------------------|--------|--------|--------|
|                               |                                 | Cd                               | Cr     | Ni     | Pb     |
| Na <sup>+</sup>               | 2500                            | 97 ± 1                           | 95 ± 2 | 96 ± 2 | 94 ± 2 |
| K <sup>+</sup>                | 2000                            | 95 ± 2                           | 94 ± 2 | 97 ± 1 | 95 ± 2 |
| Mg <sup>2+</sup>              | 1000                            | 96 ± 1                           | 95 ± 2 | 96 ± 1 | 94 ± 2 |
| Ca <sup>2+</sup>              | 500                             | 99 ± 2                           | 96 ± 1 | 97 ± 2 | 95 ± 1 |
| Cu <sup>2+</sup>              | 15                              | 94 ± 2                           | 92 ± 2 | 92 ± 2 | 93 ± 2 |
| Fe <sup>3+</sup>              | 25                              | 93 ± 2                           | 91 ± 2 | 91 ± 3 | 89 ± 3 |
| Zn <sup>2+</sup>              | 30                              | 94 ± 3                           | 92 ± 3 | 90 ± 1 | 92 ± 2 |
| Hg <sup>2+</sup>              | 30                              | 93 ± 2                           | 92 ± 2 | 90 ± 1 | 91 ± 3 |
| As <sup>3+</sup>              | 30                              | 95 ± 2                           | 93 ± 2 | 92 ± 2 | 92 ± 3 |
| Cl <sup>-</sup>               | 2500                            | 96 ± 1                           | 97 ± 3 | 94 ± 3 | 94 ± 1 |
| PO <sub>4</sub> <sup>3-</sup> | 2000                            | 96 ± 2                           | 95 ± 2 | 96 ± 1 | 93 ± 2 |
| SO <sub>4</sub> <sup>2-</sup> | 1000                            | 97 ± 1                           | 95 ± 2 | 95 ± 2 | 94 ± 2 |
| CO <sub>3</sub> <sup>2-</sup> | 2500                            | 98 ± 1                           | 96 ± 2 | 92 ± 3 | 92 ± 2 |

a Recovery

b Standard deviation

**Table S5.** Evaluation of the accuracy of the proposed using standard reference material (n=5).

| Certified values (mg kg <sup>-1</sup> ) |               |               | Measured (mg kg <sup>-1</sup> ) <sup>a</sup> |               |               | Recovery (%) |       |       | t <sub>exp</sub> <sup>b</sup> |       |       |
|-----------------------------------------|---------------|---------------|----------------------------------------------|---------------|---------------|--------------|-------|-------|-------------------------------|-------|-------|
| Cd                                      | Ni            | Pb            | Cd                                           | Ni            | Pb            | Cd           | Ni    | Pb    | Cd                            | Ni    | Pb    |
| 0.0132 ± 0.0015                         | 0.936 ± 0.094 | 0.470 ± 0.024 | 0.0134 ± 0.0022                              | 0.933 ± 0.128 | 0.464 ± 0.029 | 101.51       | 99.67 | 98.72 | 2.033                         | -     | -0.46 |
|                                         |               |               |                                              |               |               |              |       |       |                               | 0.052 |       |

<sup>a</sup> The mean value ± SD based on five replicate determinations.

<sup>b</sup>  $t_{exp} = \frac{|\bar{x} - u|}{S/\sqrt{n}}$ , where t<sub>exp</sub> was statistical value (for four degrees of freedom, the critical value of t at the 95% confidence level is 2.132), μ was the reported values, x was the experimental mean value, n was the number of independent determinations, and S was the standard deviation.

**Table S6.** Validation experiment results without the pre-concentration method.

| Element | LOD<br>( $\mu\text{g kg}^{-1}$ ) | LOQ<br>( $\mu\text{g kg}^{-1}$ ) | Linear range<br>( $\mu\text{g kg}^{-1}$ ) | $(R^2)$ | Intra-day accuracy and precision<br>(n=5) <sup>a</sup> |          |           | Inter-day accuracy and precision<br>(n=15) |          |           |
|---------|----------------------------------|----------------------------------|-------------------------------------------|---------|--------------------------------------------------------|----------|-----------|--------------------------------------------|----------|-----------|
|         |                                  |                                  |                                           |         | RSD (%)                                                |          |           | Recovery (%)                               |          |           |
|         |                                  |                                  |                                           |         | Level I                                                | Level II | Level III | Level I                                    | Level II | Level III |
| Cd      | 4.92                             | 16.43                            | 17-250                                    | 0.9914  | 5.94                                                   | 5.21     | 4.65      | 79.67                                      | 83.45    | 84.45     |
| Cr      | 9.16                             | 30.56                            | 31-300                                    | 0.9934  | 5.43                                                   | 5.16     | 5.07      | 83.44                                      | 81.45    | 80.12     |
| Ni      | 11.33                            | 37.78                            | 38-550                                    | 0.9975  | 5.13                                                   | 4.97     | 4.49      | 78.42                                      | 79.65    | 82.32     |
| Pb      | 27.62                            | 92.08                            | 93-550                                    | 0.9981  | 5.57                                                   | 5.14     | 4.87      | 77.78                                      | 80.14    | 81.45     |

<sup>a</sup> Level 1: LOQ, Level 2: 150  $\mu\text{g kg}^{-1}$ , Level 3: 250  $\mu\text{g kg}^{-1}$  for Cd, 300  $\mu\text{g kg}^{-1}$  for Cr, 550  $\mu\text{g kg}^{-1}$  for Ni and Pb.

**Table S7.** Margin of Safety (MoS) for selected TMs in the sunblock products.

| <b>Brand</b>                  | <b>Cd</b> | <b>Cr</b> | <b>Ni</b> | <b>Pb</b> |
|-------------------------------|-----------|-----------|-----------|-----------|
| <b>50% bio-accessibility</b>  |           |           |           |           |
| A                             | 1830.86   | 823.07    | 1856.98   | 360.49    |
| B                             | 1019.72   | 2061.18   | 4659.89   | 448.09    |
| C                             | 1385.94   | 1985.00   | 2965.10   | 462.56    |
| D                             | 1348.25   | 1669.59   | 3613.48   | 419.64    |
| E                             | 886.47    | 1269.46   | 3555.66   | 402.04    |
| F                             | 1220.57   | 1170.33   | 3014.33   | 395.07    |
| G                             | 1013.31   | 1383.96   | 3556.64   | 448.09    |
| H                             | 1323.33   | 956.65    | 2414.63   | 347.19    |
| I                             | 1246.54   | 1113.70   | 4435.40   | 374.31    |
| J                             | 1889.92   | 1414.33   | 3273.05   | 429.93    |
| K                             | 1365.39   | 1105.43   | 2718.11   | 387.82    |
| <b>100% bio-accessibility</b> |           |           |           |           |
| A                             | 1068.01   | 411.53    | 928.49    | 180.24    |
| B                             | 594.84    | 1030.59   | 2329.95   | 224.04    |
| C                             | 808.47    | 992.50    | 1482.55   | 231.28    |
| D                             | 786.48    | 834.80    | 1806.74   | 209.82    |
| E                             | 517.11    | 634.73    | 1777.83   | 201.02    |
| F                             | 712.00    | 585.17    | 1507.16   | 197.54    |
| G                             | 591.10    | 691.98    | 1778.32   | 224.04    |
| H                             | 771.94    | 478.33    | 1207.31   | 173.59    |
| I                             | 727.15    | 556.85    | 2217.70   | 187.15    |
| J                             | 1102.45   | 707.17    | 1636.52   | 214.96    |
| K                             | 796.48    | 644.83    | 1585.56   | 226.23    |



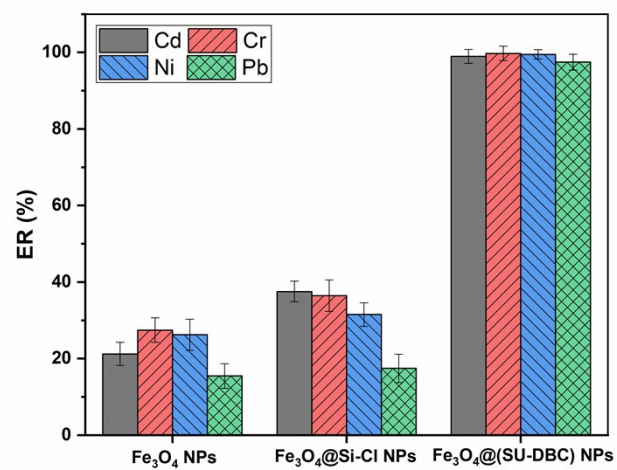

**Fig. S1. a)** Effect of type of nano-sorbent on ER.

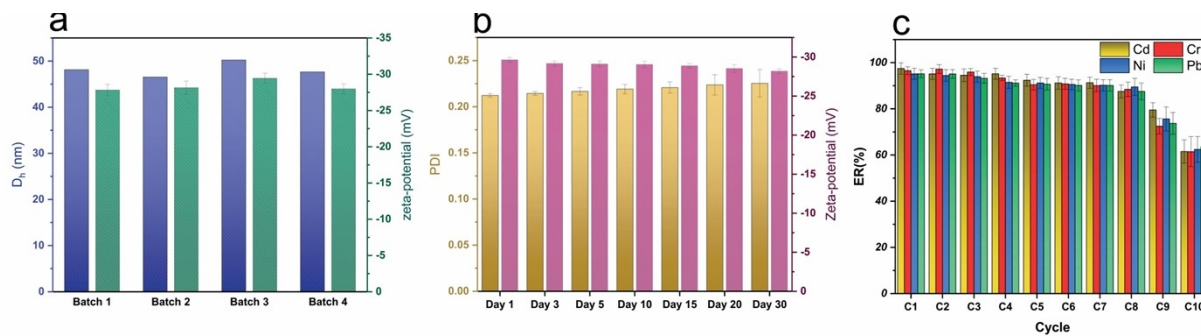

**Fig. S2. a)** Batch-to-batch reproducibility study of Fe<sub>3</sub>O<sub>4</sub>@(SU-DBC) NPs, **b)** Stability study of Fe<sub>3</sub>O<sub>4</sub>@(SU-DBC) NPs, **c)** Reusability of sorbent.

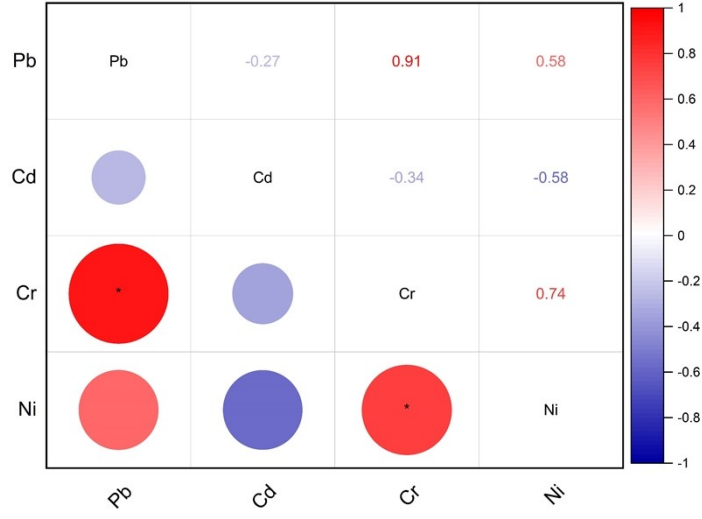

\* p<=0.05

**Fig. S3.** Correlation coefficient of TMs' concentration (mg kg<sup>-1</sup>) in sunblock products.
